# Supplementary material for: MAPK4 promotes triple negative breast cancer growth and reduces tumor sensitivity to PI3K blockade
Source: PubMed Central journal article supplement (PMC8752662; doi:10.1038/s41467-021-27921-1), 2022-01-11
Supplement: 41467_2021_27921_MOESM1_ESM.pdf [file 41467_2021_27921_MOESM1_ESM.pdf]

## Supplementary Information

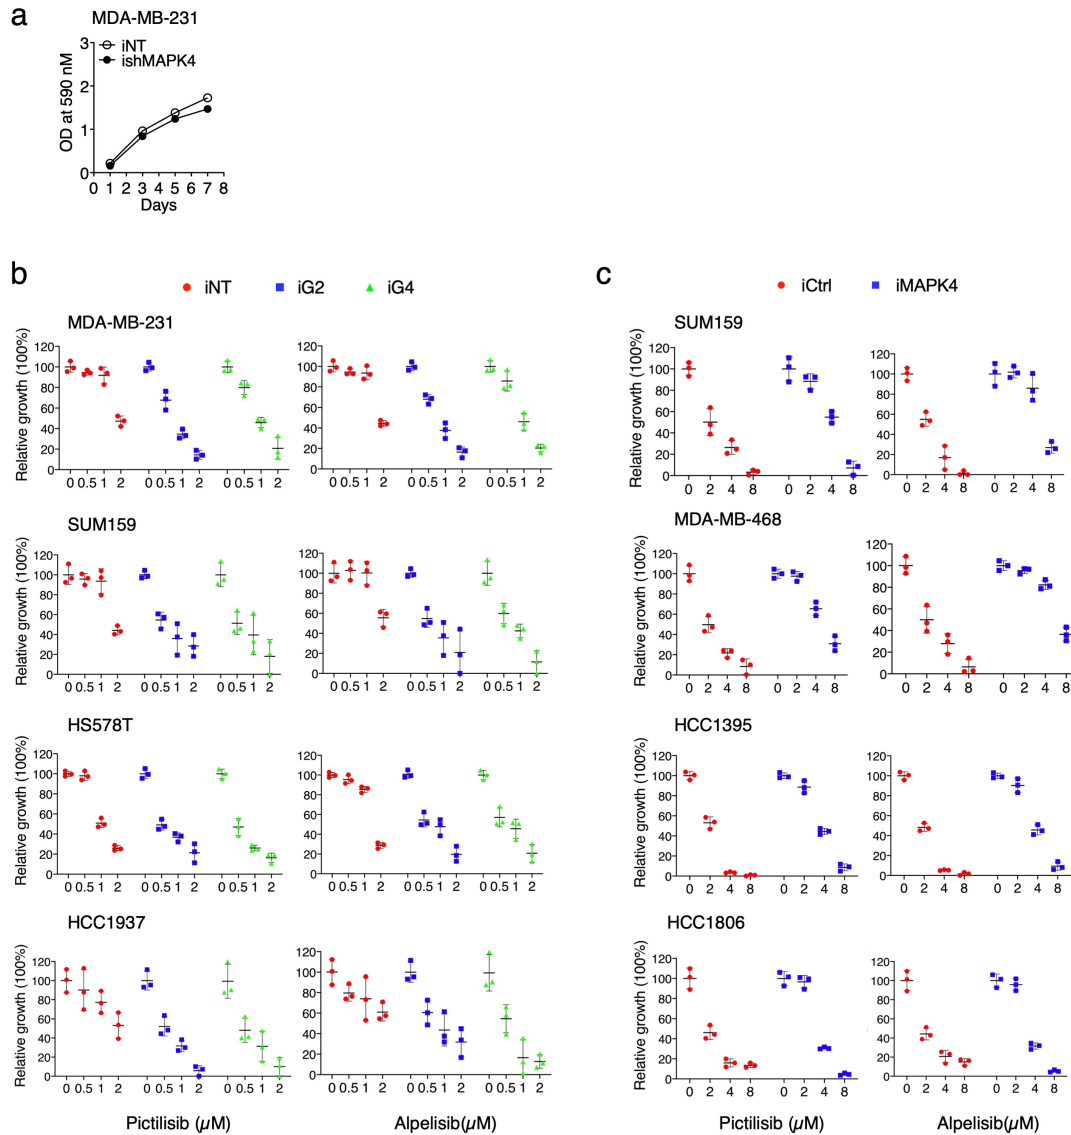

**Supplementary Fig. S1 MAPK4 regulation of TNBC cells.** **a** Proliferation assays comparing the growth of engineered MDA-MB-231 cells with 4  $\mu$ g/ml Dox-induced knockdown of MAPK4 (ishMAPK4) or control (iNT). **b** The relative growth of MAPK4-knockdown TNBC cells as described in Fig. 7a-d. **c** The relative growth of MAPK4-overexpressing TNBC cells as described in Fig. 8a-d. All vehicle treated arms were set at 100% to provide relative growth inhibition by PI3K inhibitors in these differentially engineered TNBC cells.

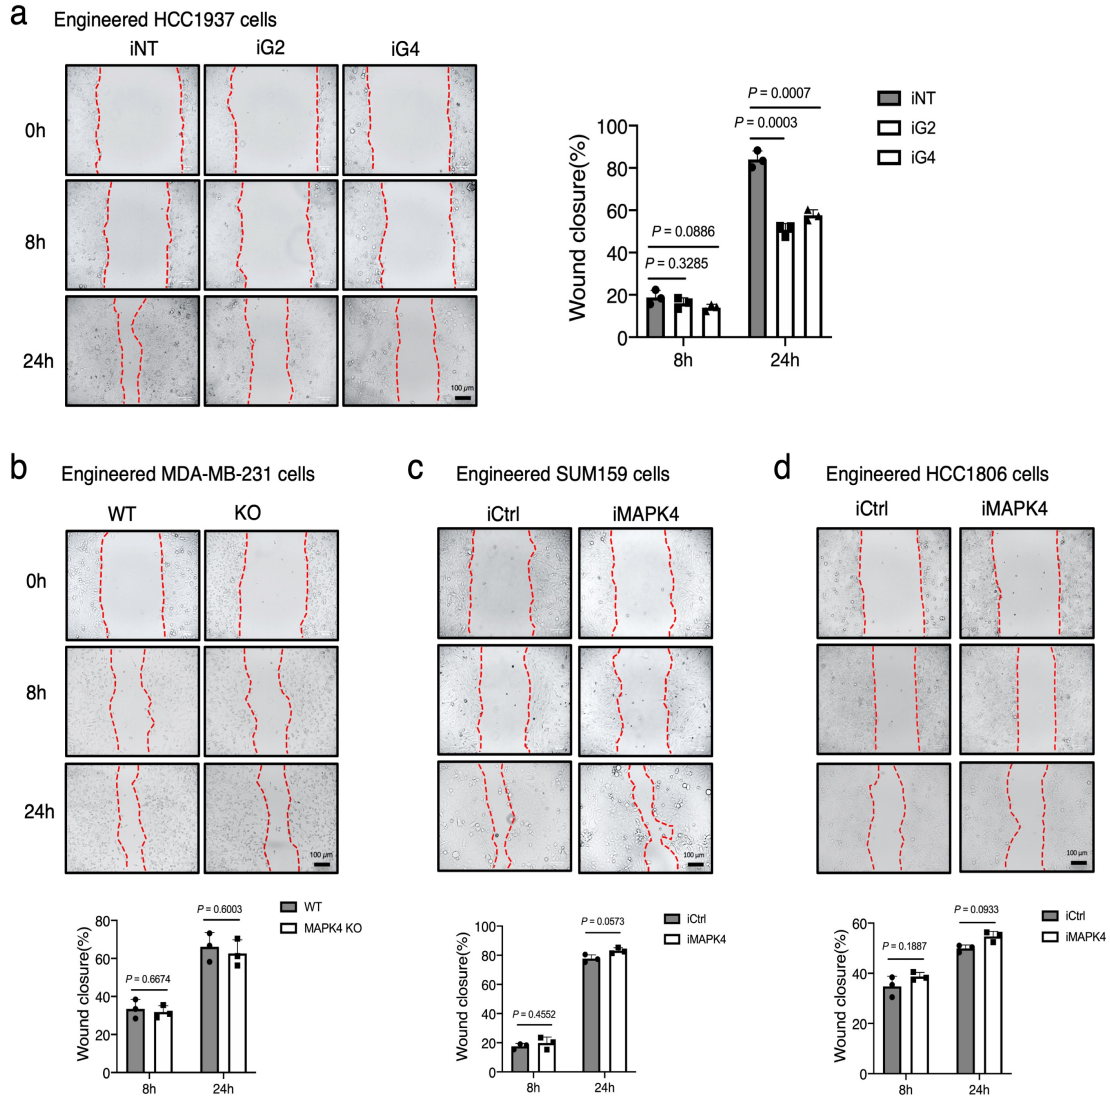

**Supplementary Fig. S2 MAPK4 regulation of TNBC cell migration.** Wound healing assays on the engineered **a** H1937 cells with 4  $\mu\text{g/ml}$  Dox induced knockdown of MAPK4 (iG2, iG4) or control (iNT), **b** wild type (WT) and *MAPK4*-knockout (KO, clone #3) MDA-MB-231 cells, and **c,d** SUM159 and HCC1806 cells with 0.5  $\mu\text{g/ml}$  Dox induced overexpression of MAPK4 (iMAPK4) or control (iCtrl). Representative images of cells after 0, 8h, and 24h after the initial scratch were shown. Bar: 100  $\mu\text{m}$ . Also shown are the quantification (mean  $\pm$  SD) of percentage of wound closure at 8h and 24h after scratch. *P* values determined by unpaired 2-tailed Student's *t* test. Data are representative of at least 2-3 independent experiments.

Source Data for supplementary Fig. 1a

| Day | iNT   |       |       | ishMAPK4 (G4) |       |       |
|-----|-------|-------|-------|---------------|-------|-------|
| 1   | 0.226 | 0.211 | 0.21  | 0.172         | 0.163 | 0.14  |
| 3   | 0.925 | 0.99  | 0.973 | 0.897         | 0.851 | 0.773 |
| 5   | 1.42  | 1.366 | 1.358 | 1.301         | 1.196 | 1.23  |
| 7   | 1.762 | 1.693 | 1.721 | 1.417         | 1.469 | 1.522 |

Source Data for supplementary Fig. 1b

MDA-MB-231

| Pictilisib | iNT   |       |       | iG2   |       |       | iG4   |       |       |
|------------|-------|-------|-------|-------|-------|-------|-------|-------|-------|
|            | 0     | 105.7 | 99    | 95.38 | 104.5 | 96.3  | 99.18 | 107   | 97.19 |
| 0.5        | 93.92 | 92.4  | 96.94 | 68.74 | 76.3  | 58.04 | 84.2  | 72.01 | 83.4  |
| 1          | 93.97 | 82.8  | 98.61 | 39.49 | 30.8  | 33.27 | 48.4  | 48.88 | 40.1  |
| 2          | 47.54 | 42.1  | 52.18 | 10.33 | 14.1  | 18.83 | 12.1  | 32.93 | 17.2  |
| Alpelisib  | iNT   |       |       | iG2   |       |       | iG4   |       |       |
|            | 0     | 105.7 | 99    | 95.38 | 104.5 | 96.3  | 99.18 | 107   | 97.19 |
| 0.5        | 92.86 | 92.7  | 98.05 | 63.25 | 68.7  | 72.3  | 81.5  | 96.96 | 79    |
| 1          | 92.2  | 101   | 87.77 | 44.88 | 29.7  | 38.21 | 38.6  | 44.66 | 55    |
| 2          | 42.09 | 44    | 47.49 | 20.66 | 17.7  | 10.88 | 23    | 16.07 | 22.1  |

SUM159

| Pictilisib | iNT   |      |       | iG2   |       |       | iG4   |       |       |
|------------|-------|------|-------|-------|-------|-------|-------|-------|-------|
|            | 0     | 111  | 92.5  | 96.51 | 104.5 | 96.9  | 98.62 | 95.3  | 113.6 |
| 0.5        | 96.51 | 101  | 89.68 | 45.58 | 57.4  | 60.71 | 64.3  | 46.2  | 43.6  |
| 1          | 104   | 97.2 | 79.64 | 50.88 | 19.3  | 37.52 | 23.4  | 61.68 | 33.4  |
| 2          | 48.95 | 40.3 | 43.1  | 18.07 | 27.3  | 39.88 | 20.6  | 33.6  | 0     |
| Alpelisib  | iNT   |      |       | iG2   |       |       | iG4   |       |       |
|            | 0     | 111  | 92.5  | 96.51 | 104.5 | 96.9  | 98.62 | 95.3  | 113.6 |
| 0.5        | 93.03 | 112  | 103.6 | 65.03 | 50.9  | 48.53 | 68.5  | 62.34 | 48.4  |
| 1          | 87.73 | 103  | 110.3 | 50.88 | 17.9  | 37.52 | 44.4  | 34.93 | 48    |
| 2          | 59.55 | 61.2 | 45.75 | 0     | 18.5  | 44.2  | 0     | 11.94 | 22.3  |

HS578T

| Pictilisib | iNT   |       |       | iG2   |       |       | iG4   |       |       |
|------------|-------|-------|-------|-------|-------|-------|-------|-------|-------|
|            | 0     | 102.8 | 99.6  | 97.52 | 105.2 | 95.4  | 99.38 | 105   | 95.24 |
| 0.5        | 97.22 | 103   | 93.85 | 44.74 | 47.7  | 54.81 | 47.4  | 55.19 | 38.4  |
| 1          | 47.15 | 56    | 49.42 | 32.15 | 40.4  | 37.94 | 29.2  | 25.1  | 23.8  |
| 2          | 28.8  | 23.7  | 25.19 | 11.25 | 22.3  | 30.3  | 19    | 18.91 | 10.8  |

| Alpelisib |       | iNT  |       | iG2   |      |       | iG4  |       |      |
|-----------|-------|------|-------|-------|------|-------|------|-------|------|
| 0         | 102.8 | 99.6 | 97.52 | 105.2 | 97.7 | 99.38 | 105  | 95.24 | 100  |
| 0.5       | 100.2 | 94.5 | 91.57 | 62.53 | 49.7 | 51.12 | 50.8 | 52.35 | 68.2 |
| 1         | 81.92 | 88   | 86.41 | 54.81 | 49.6 | 38.44 | 34.5 | 50.63 | 51.7 |
| 2         | 31.4  | 25.5 | 29.34 | 18.55 | 27.9 | 12.67 | 19.7 | 30.26 | 12.5 |

HCC1937

| Pictilisib |       | iNT  |       | iG2   |      |       | iG4  |       |      |
|------------|-------|------|-------|-------|------|-------|------|-------|------|
| 0          | 87.51 | 101  | 111.7 | 111.5 | 95.4 | 93.16 | 90.4 | 121.9 | 87.7 |
| 0.5        | 69.75 | 87.7 | 112.9 | 63.47 | 48.3 | 44.53 | 41.3 | 62.57 | 40.1 |
| 1          | 66.2  | 89.1 | 76.37 | 26.84 | 38.2 | 30    | 30.2 | 47.6  | 15.9 |
| 2          | 39.24 | 53.6 | 66.52 | 7.263 | 0    | 10.11 | 0    | 11.08 | 19.2 |
| Alpelisib  |       | iNT  |       | iG2   |      |       | iG4  |       |      |
| 0          | 87.51 | 101  | 112.2 | 111.5 | 95.4 | 93.16 | 90.4 | 120.7 | 87.7 |
| 0.5        | 73.79 | 76.4 | 88.64 | 48.63 | 72.6 | 60.32 | 58.1 | 39.52 | 66.2 |
| 1          | 53.12 | 73.1 | 95.59 | 31.89 | 61.3 | 37.58 | 12.6 | 35.63 | 1.5  |
| 2          | 54.57 | 57.5 | 70.88 | 33.79 | 44.8 | 16.74 | 20.1 | 7.186 | 11.4 |

Source Data for supplementary Fig. 1c

SUM159

| Pictilisib |      | iCtrl |       | iMAPK4 |      |      |
|------------|------|-------|-------|--------|------|------|
| 0          | 101  | 93.2  | 105.9 | 101.8  | 87.8 | 110  |
| 0.5        | 39   | 63.8  | 47.68 | 92.3   | 80.1 | 92.5 |
| 1          | 33.5 | 24.8  | 20.87 | 55.14  | 49.3 | 60.2 |
| 2          | 3.91 | 5.22  | 0.435 | 8.569  | 12.8 | 0.28 |
| Alpelisib  |      | iCtrl |       | iMAPK4 |      |      |
| 0          | 101  | 93.2  | 105.9 | 101.8  | 87.8 | 110  |
| 0.5        | 53.5 | 62.5  | 48.99 | 107.9  | 96.5 | 101  |
| 1          | 4.93 | 17.1  | 28.55 | 74.05  | 83.1 | 100  |
| 2          | 0    | 0     | 4.058 | 21.98  | 33.1 | 25.8 |

MDA-MB-468

| Pictilisib |      | iCtrl |       | iMAPK4 |      |      |
|------------|------|-------|-------|--------|------|------|
| 0          | 98.4 | 93    | 108.6 | 99.98  | 104  | 95.5 |
| 2          | 47.1 | 58.7  | 43.24 | 101.8  | 92.4 | 98.5 |
| 4          | 24.4 | 24.2  | 16.87 | 65.64  | 72   | 58.6 |
| 8          | 10.1 | 14.9  | 0.331 | 38.63  | 24   | 30   |

| Alpelisib |      | iCtrl |       | iMAPK4 |      |      |
|-----------|------|-------|-------|--------|------|------|
| 0         | 98.5 | 93    | 108.6 | 99.98  | 104  | 95.5 |
| 2         | 63.4 | 47    | 39.37 | 97.05  | 96.7 | 92.3 |
| 4         | 36   | 18.1  | 29.67 | 86.95  | 81.1 | 78.7 |
| 8         | 14.4 | 2.1   | 2.757 | 30.62  | 43.1 | 35.8 |

HCC1395

| Pictilisib |      | iCtrl |       | iMAPK4 |      |      |
|------------|------|-------|-------|--------|------|------|
| 0          | 104  | 101   | 95.69 | 97.98  | 98.8 | 103  |
| 2          | 46.8 | 58.5  | 53.85 | 88.18  | 95   | 82.9 |
| 4          | 3.15 | 4.41  | 3.09  | 41.43  | 44.6 | 47.4 |
| 8          | 0.92 | 0     | 1.374 | 9.159  | 4.93 | 11.8 |

| Alpelisib |      | iCtrl |       | iMAPK4 |      |      |
|-----------|------|-------|-------|--------|------|------|
| 0         | 104  | 101   | 95.69 | 97.98  | 98.8 | 103  |
| 2         | 47.1 | 44.8  | 52.71 | 83.14  | 97   | 90.6 |
| 4         | 4.86 | 5.84  | 5.265 | 44.83  | 51   | 41.1 |
| 8         | 1.66 | 0     | 3.205 | 5.964  | 8.06 | 13.9 |

HCC1806

| Pictilisib |      | iCtrl |       | iMAPK4 |      |      |
|------------|------|-------|-------|--------|------|------|
| 0          | 89   | 101   | 109.8 | 106    | 101  | 92.5 |
| 2          | 44.3 | 53.7  | 40.41 | 99.61  | 89.3 | 101  |
| 4          | 15.9 | 20    | 11.93 | 30.26  | 31.8 | 29.9 |
| 8          | 11.4 | 13.3  | 15.94 | 5.815  | 3.54 | 4.42 |

| Alpelisib |      | iCtrl |       | iMAPK4 |      |      |
|-----------|------|-------|-------|--------|------|------|
| 0         | 89   | 101   | 109.8 | 106    | 101  | 92.5 |
| 2         | 42.8 | 38.8  | 51.24 | 101.9  | 95.8 | 89.4 |
| 4         | 25.4 | 23.2  | 13.27 | 34.63  | 32   | 28.1 |
| 8         | 11   | 16.4  | 17.4  | 4.285  | 6.82 | 5.03 |

Source Data for supplementary Fig. 2a

|     | iNT  |       |       | iG2   |       |       | iG4   |       |       |
|-----|------|-------|-------|-------|-------|-------|-------|-------|-------|
| 8h  | 15.6 | 22.34 | 18.57 | 16.35 | 13.72 | 18.43 | 14.38 | 12.79 | 15.95 |
| 24h | 80.2 | 88.32 | 83.41 | 52.56 | 52.34 | 47.42 | 57.46 | 60.68 | 55.77 |

Source Data for supplementary Fig. 2b

|     | WT    |       |       | MAPK4 KO |       |       |
|-----|-------|-------|-------|----------|-------|-------|
| 8h  | 33.42 | 38.42 | 28.45 | 35.52    | 30.92 | 29.04 |
| 24h | 66.76 | 73.24 | 58.19 | 61.23    | 56.37 | 70.43 |

Source Data for supplementary Fig. 2c

|     | iCtrl |       |       | iMAPK4 |       |       |
|-----|-------|-------|-------|--------|-------|-------|
| 8h  | 18.32 | 15.34 | 19.04 | 20.41  | 23.57 | 15.32 |
| 24h | 80.43 | 77.74 | 75.82 | 85.32  | 88.58 | 81.34 |

Source Data for supplementary Fig. 2d

|     | iCtrl |       |       | iMAPK4 |       |       |
|-----|-------|-------|-------|--------|-------|-------|
| 8h  | 35.17 | 30.45 | 38.82 | 40.58  | 37.28 | 38.37 |
| 24h | 50.42 | 51.07 | 48.38 | 55.57  | 52.41 | 56.91 |
